# Supplementary material for: Theoretical Study on the Gas-Phase and Aqueous Interface Reaction Mechanism of Criegee Intermediates with 2-Methylglyceric Acid and the Nucleation of Products
Source: MDPI journal article supplement (doi:10.3390/ijms24065400), 2023-03-11
Supplement: s1 [file s1]

## Supplementary Material

# Theoretical Study on the Gas-Phase and Aqueous Interface Reaction Mechanism of Criegee Intermediates with 2-Methylglyceric Acid and the Nucleation of Products

Lei Li, Qingzhu Zhang \*, Yuanyuan Wei, Qiao Wang and Wenxing Wang

Environment Research Institute, Shandong University, Qingdao 266237, China

\* Correspondence: zqz@sdu.edu.cn

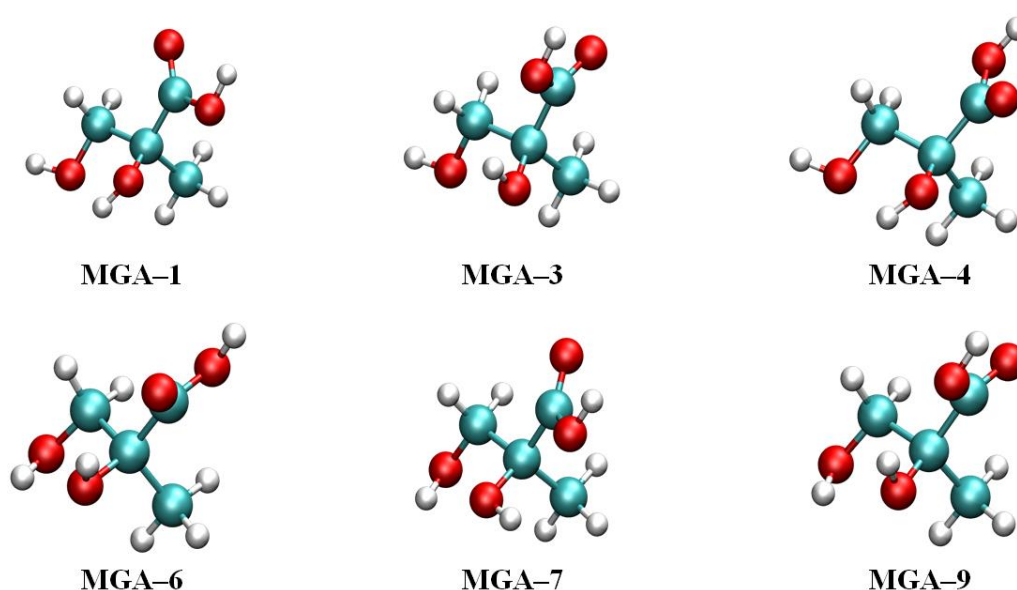

**Fig. S1.** The six configurations of MGA molecule.

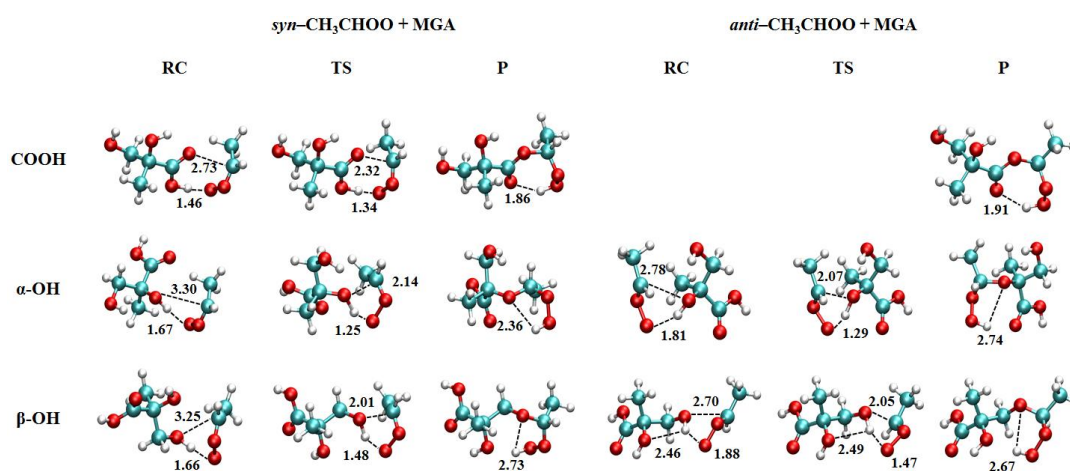

**Fig. S2.** The structures of bimolecular reaction complexes (RC), transition states (TS) and products (P).

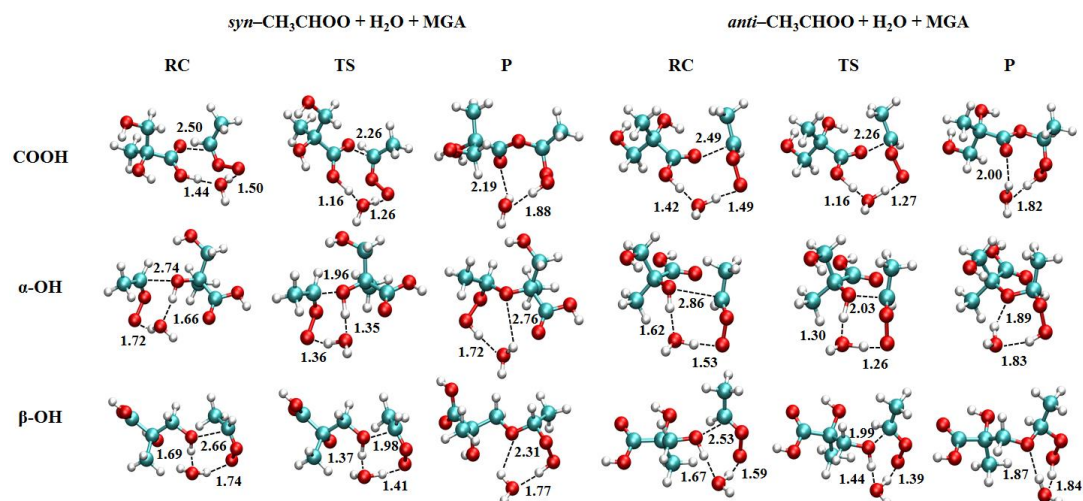

**Fig. S3.** The structures of water-mediated reaction complexes (RC), transition states (TS) and products (P).

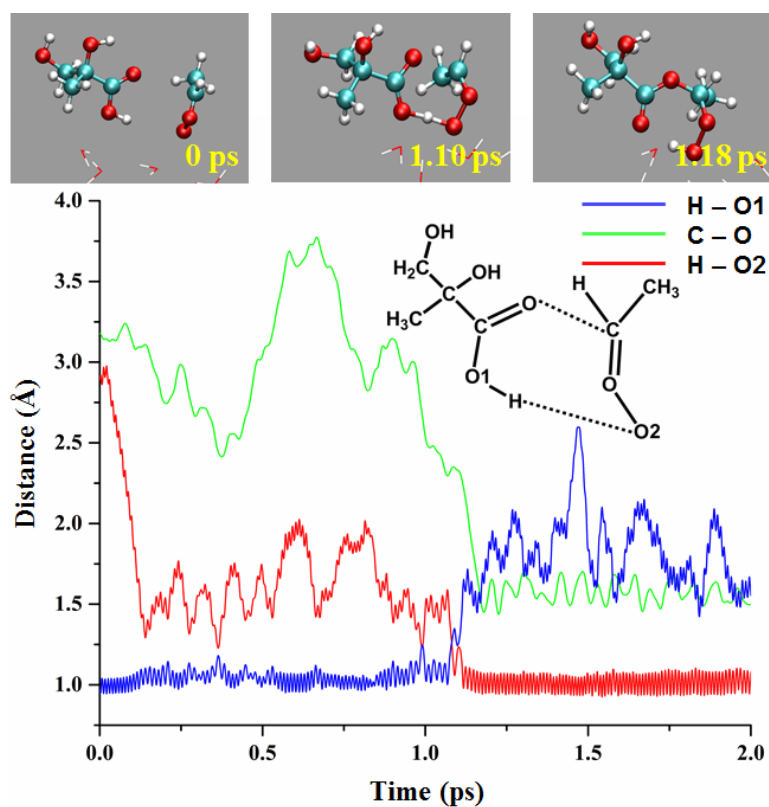

**Fig. S4.** The key bond length variations and snapshots of the gas-liquid interfacial reaction of *syn*-CH<sub>3</sub>CHOO with the MGA COOH group.

System 2

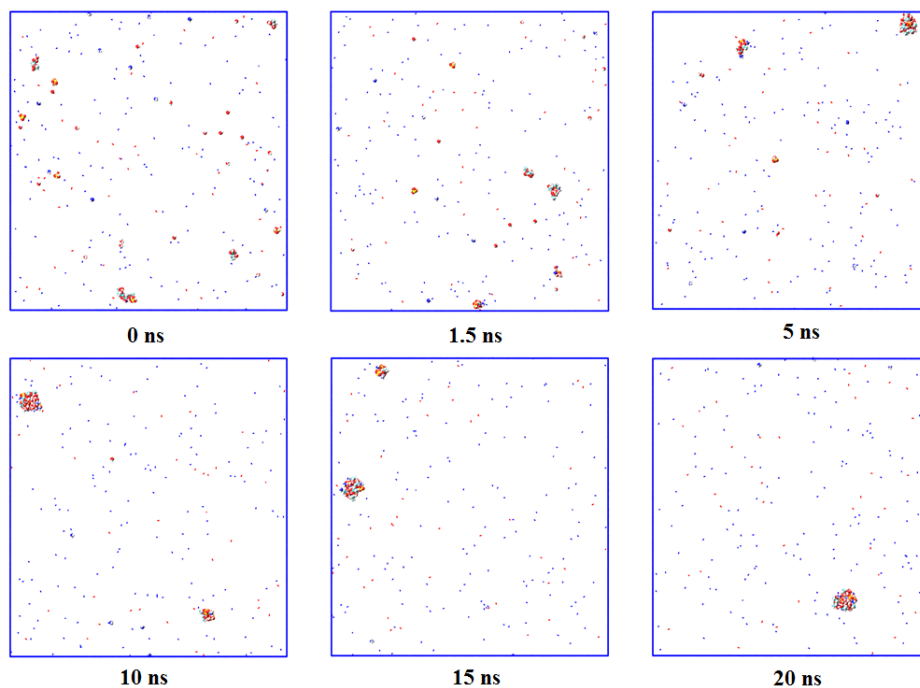

**Fig. S5.** The snapshots of nucleation simulation for the reaction product of *anti*-CH<sub>3</sub>CHOO + MGA-β-OH.

System 3

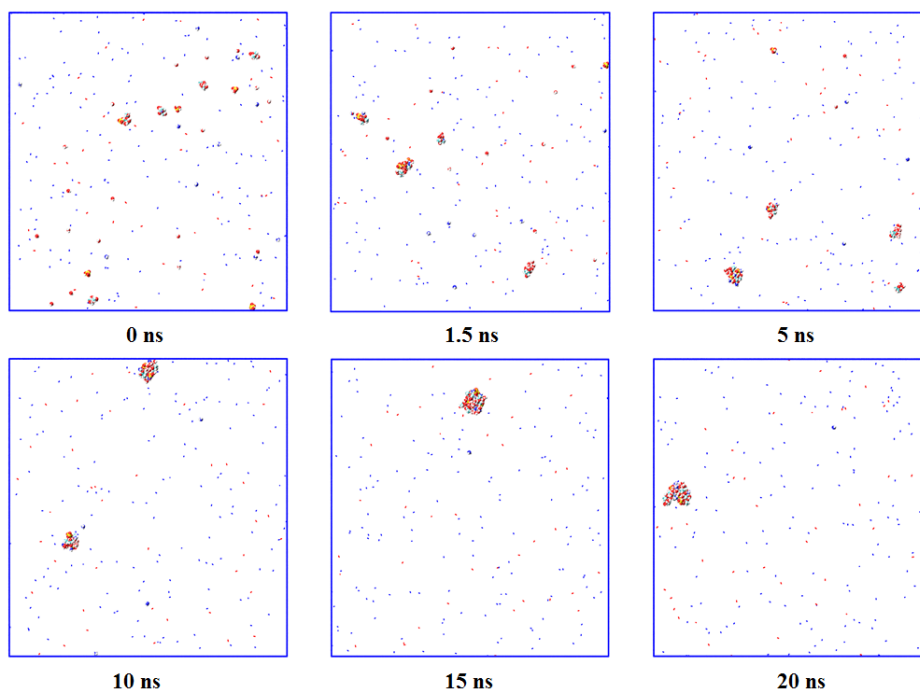

**Fig. S6.** The snapshots of nucleation simulation for the reaction product of *anti*-CH<sub>3</sub>CHOO + MGA-α-OH.

**System 4**

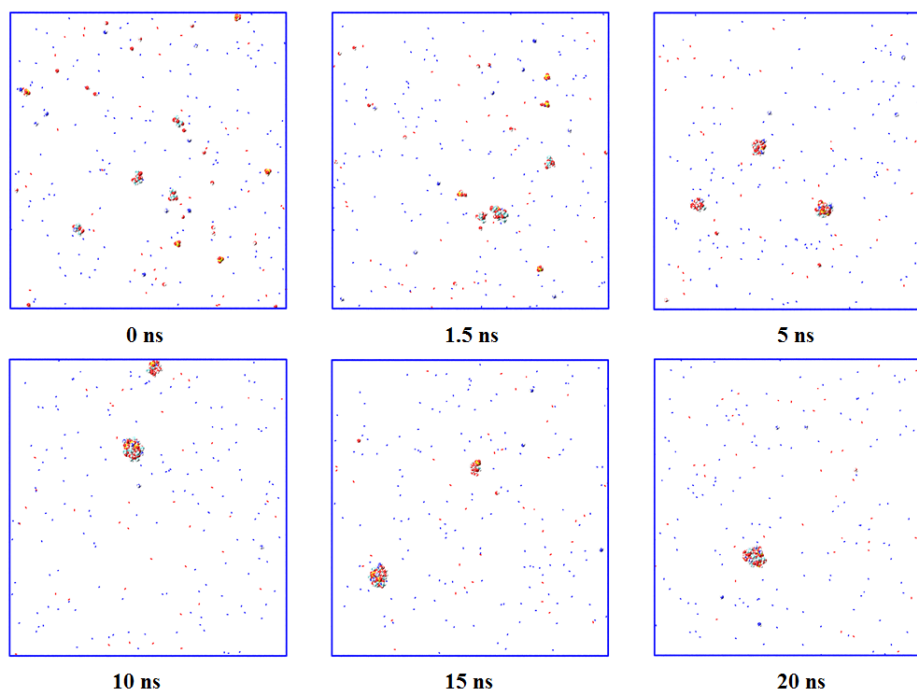

**Fig. S7.** The snapshots of nucleation simulation for the reaction product of *syn*-CH<sub>3</sub>CHOO + MGA-COOH.

**System 5**

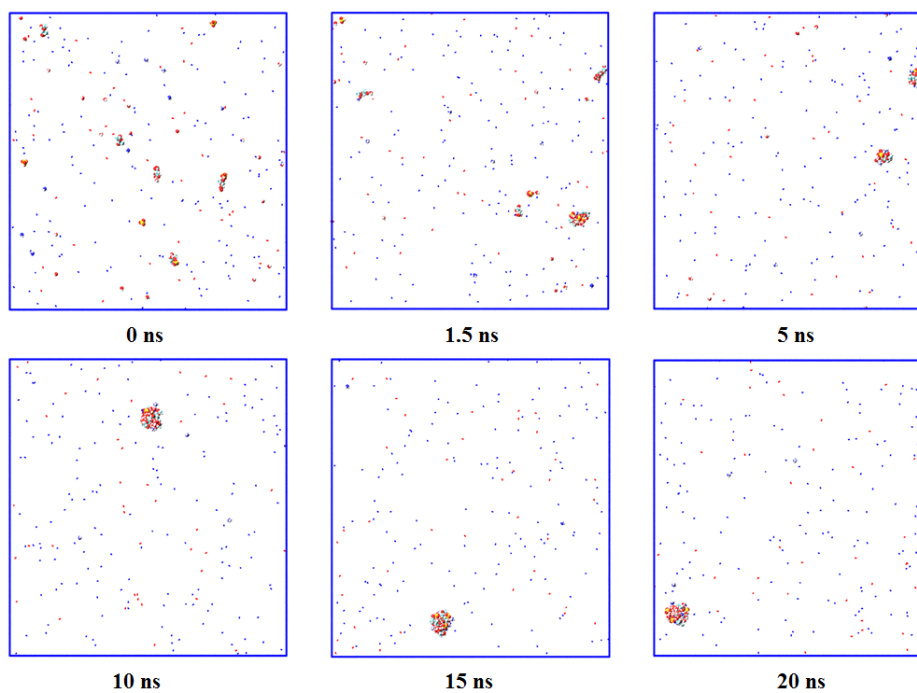

**Fig. S8.** The snapshots of nucleation simulation for the reaction product of *syn*-CH<sub>3</sub>CHOO + MGA-β-OH.

System 6

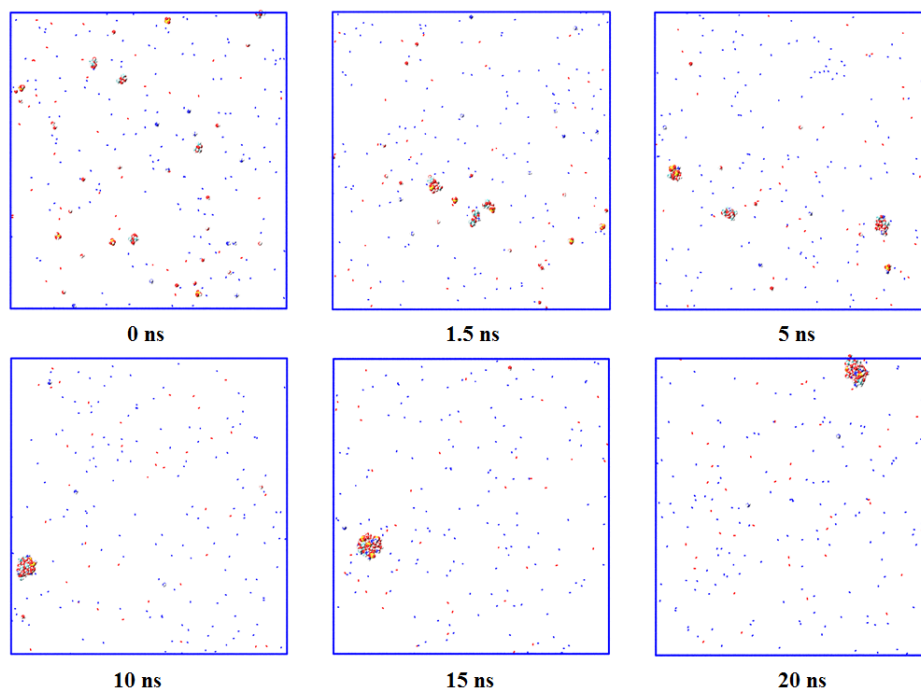

**Fig. S9.** The snapshots of nucleation simulation for the reaction product of *syn*-  
 $\text{CH}_3\text{CHOO} + \text{MGA-}\alpha\text{-OH}$ .
